# Supplementary material
Source: Springer Nature journal article supplement (https://www.springermedizin.de/resource/supplementary/13256_2012_2320_MOESM8_ESM.pdf/9649490)

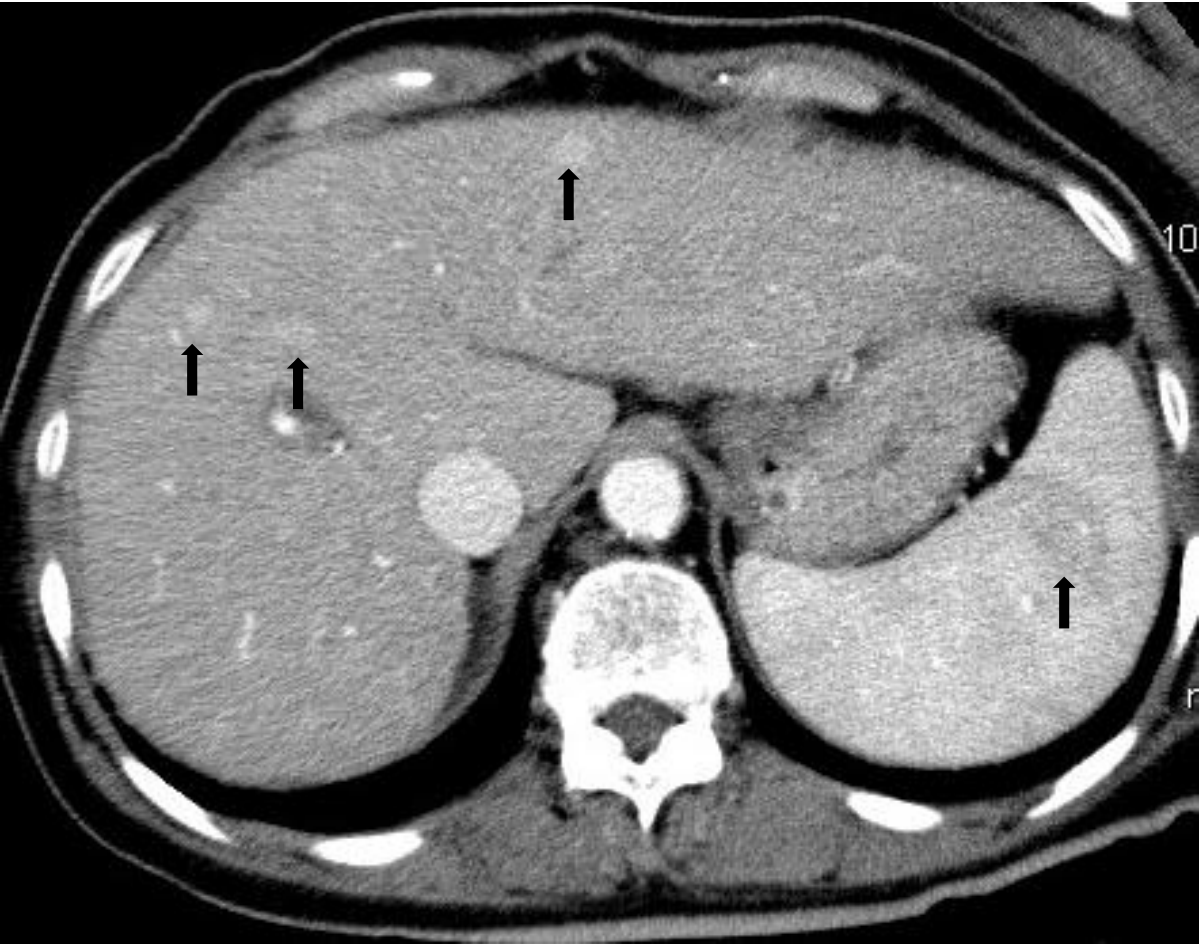

Supplement: MOESM8 [file 9649490]
